# Supplementary material
Source: publisher figshare collection journal article supplement (https://karger.figshare.com/ndownloader/files/14769725)
Supplement: Supplementary file 1 [file 14769725]

## Sheet: Table S1
Table S1. Associations between other clinical factors and anastomotic leakage in the univariate analyses
Variables		Total		Anastomotic leakage				p value
				－		＋
Smoking within 1 y	Absent	123	(65.4%)	108	(57.4%)	15	(8.0%)	0.136
	Present	65	(34.6%)	51	(27.1%)	14	(7.4%)
Cerebral vascular disease	Absent	180	(95.7%)	153	(81.4%)	27	(14.4%)	0.357
	Present	8	(4.3%)	6	(3.2%)	2	(1.1%)
COPD	Absent	182	(96.8%)	155	(82.4%)	27	(14.4%)	0.232
	Present	6	(3.2%)	4	(2.1%)	2	(1.1%)
Histological type	Squamous cell carcinoma	171	(91.0%)	147	(78.2%)	24	(12.8%)	0.149
	Others	17	(9.0%)	12	(6.4%)	5	(2.7%)
Oral tumor edge	Supracarinal	27	(14.4%)	20	(10.6%)	7	(3.7%)	0.145
	Infracarinal	161	(85.6%)	139	(73.9%)	22	(11.7%)
Thoracic procedure	Right thoracotomy	89	(47.3%)	76	(40.4%)	13	(6.9%)	0.841
	Minimally invasive esophagectomy	99	(52.7%)	83	(44.1%)	16	(8.5%)
Abdominal procedure	Open laparotomy	89	(47.3%)	75	(39.9%)	14	(7.4%)	1
	Hand-assisted laparotomy	99	(52.7%)	84	(44.7%)	15	(8.0%)
Pathological T factor	pT0-1	61	(32.4%)	52	(27.7%)	9	(4.8%)	0.105
	pT2-4	127	(67.6%)	107	(56.9%)	20	(10.6%)
Pathological N factor	pN0	110	(58.5%)	93	(49.5%)	17	(9.0%)	1
	pN1-3	78	(41.5%)	66	(35.1%)	12	(6.4%)
Pathological M factor	pM0	183	(97.3%)	154	(81.9%)	29	(15.4%)	1
	pM1	5	(2.7%)	5	(2.7%)	0	(0.0%)
Lymphadenectomy field	2 fields	164	(87.2%)	137	(72.9%)	27	(14.4%)	0.381
	3 fields	24	(12.8%)	22	(11.7%)	2	(1.1%)
Data are presented as number or median (range). -, negative; +, positive; COPD, chronic obstructive pulmonary disease. *p<0.05, **p<0.10

## Sheet: TableS2
Table S2. Associations between short-term outcomes and gastric tube shape
	Narrow gastric tube	Stretched gastric tube	p value
	(N=121)	(N=67)
Anastomotic leakage	24 (19.8%)	5 (7.6%)	0.034*
Postoperative pneumonia	20 (16.5%)	14 (20.1%)	0.553
Severe postoperative morbidities	3 (2.5%)	6 (9.0%)	0.136
Hospital mortality	0 (0.0%)	2 (3.0%)	0.126
30-Day mortality	0 (0.0%)	2 (3.0%)	0.126
Postoperative hospital stay (d)	17 (8-106)	15 (10-97)	0.568
Data are presented as number (percentage) or median (range). *p<0.05

## Sheet: TableS3
Table S3. Anastomotic leakage and historical factors according to the early and late period of narrow gastric tube reconstruction
		First half (February, 2013-October, 2014 )	Second half (November, 2014-April, 2016 )	p value
		(N=61)	(N=60)
Anastomotic leakage		10 (16.4%)	14 (23.3%)	0.37
Operation time (min)		454 (304-620)	404 (264-587)	0.029*
Intraoperative bleeding volume (mL)		255 (45-1511)	265 (45-1083)	0.68
Thoracic procedure	Right thoracotomy	34 (55.7%)	33 (54.1%)	1
	Minimally invasive esophagectomy	27 (44.3%)	27 (45.9%)
Abdominal procedure	Open laparotomy	35 (57.4%)	36 (60.0%)	0.854
	Hand-assisted laparotomy	26 (42.6%)	24 (40.0%)
Data are presented as number (percentage) or median (range). *p<0.05
